# Supplementary material
Source: PubMed Central journal article supplement (PMC4539133)
Supplement: NIHMS714754-supplement-Supplementary_file_1.pdf [file NIHMS714754-supplement-Supplementary_file_1.pdf]

SUPPLEMENTARY FIG. S1

Structure of carnitine and acylcarnitines significantly upregulated after exposure to ionizing radiation

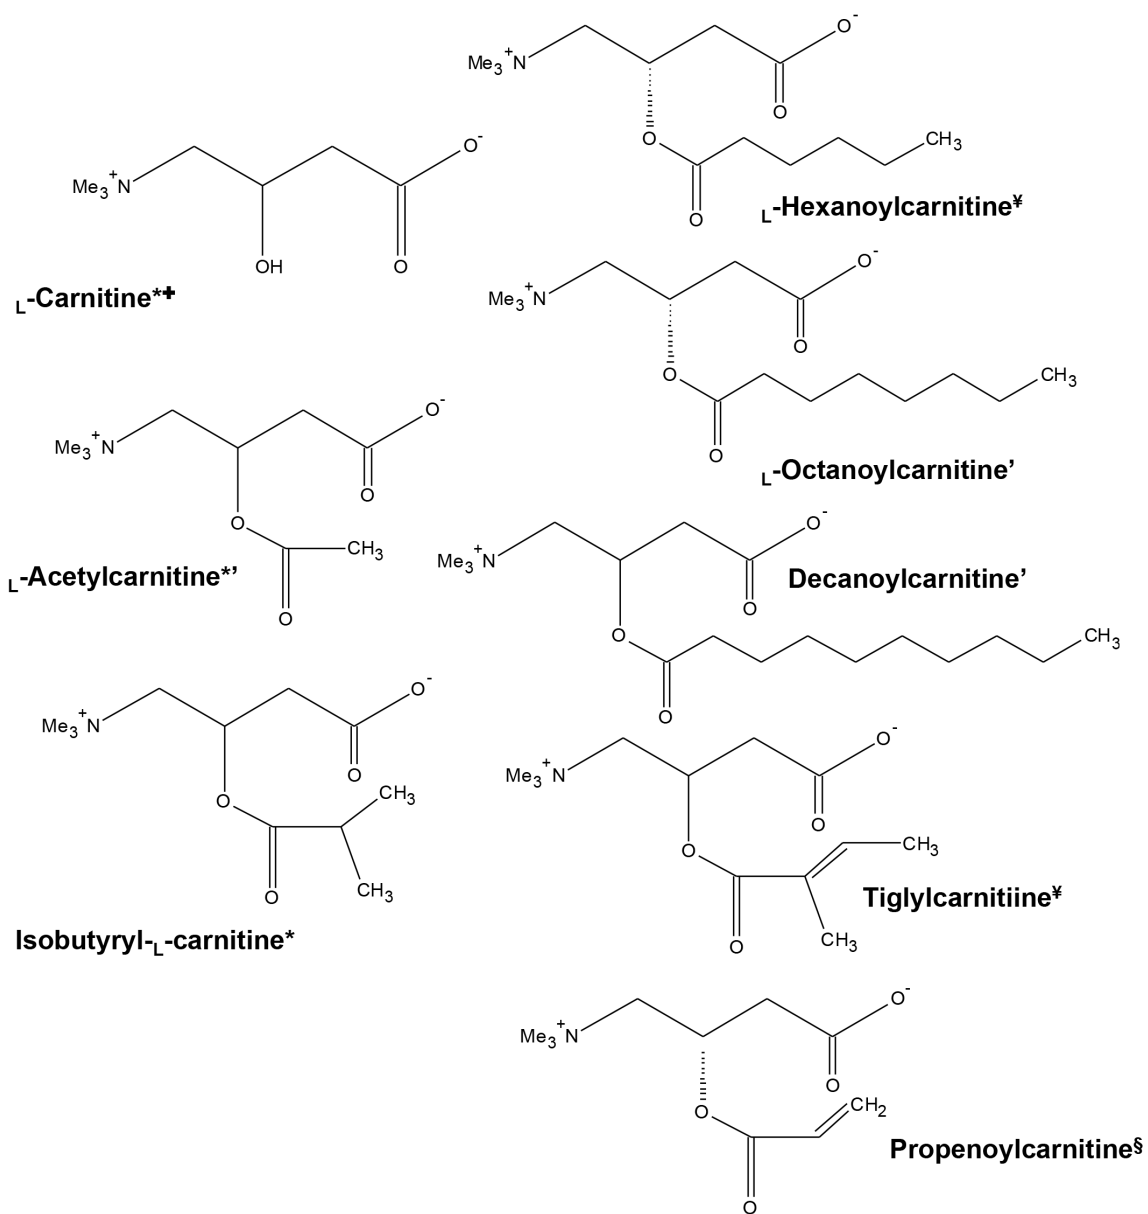

Notes. \*Current study; <sup>'</sup>human urine, Laiakis *et al.* (2014); <sup>‡</sup>mouse urine, Goudarzi *et al.* (35, 36); <sup>§</sup>mouse urine, Laiakis *et al.* (8); <sup>†</sup>rat urine, Mak *et al.* (17).

SUPPLEMENTARY FIG. S2  
Biosynthesis of L-carnitine from trimethyllysine

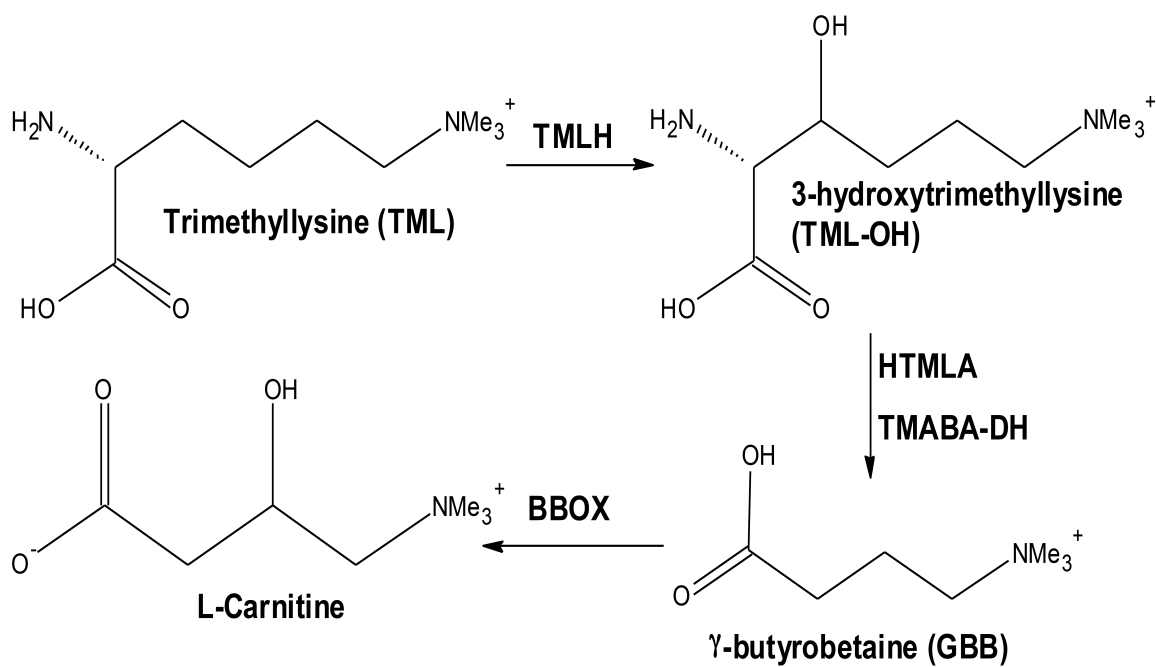

*Notes.* TMLH,  $\text{N}^\epsilon$ -trimethyllysine hydroxylase; HTMLA, 3-hydroxy- $\text{N}^\epsilon$ -trimethyllysine aldolase; TMABA-DH, 4-N-trimethylaminobutyraldehyde dehydrogenase; BBOX,  $\gamma$ -butyrobetaine dioxygenase.

SUPPLEMENTARY FIG. S3

Kynurenic acid and xanthurenic acid are byproducts of tryptophan metabolism and indicate impaired kidney function

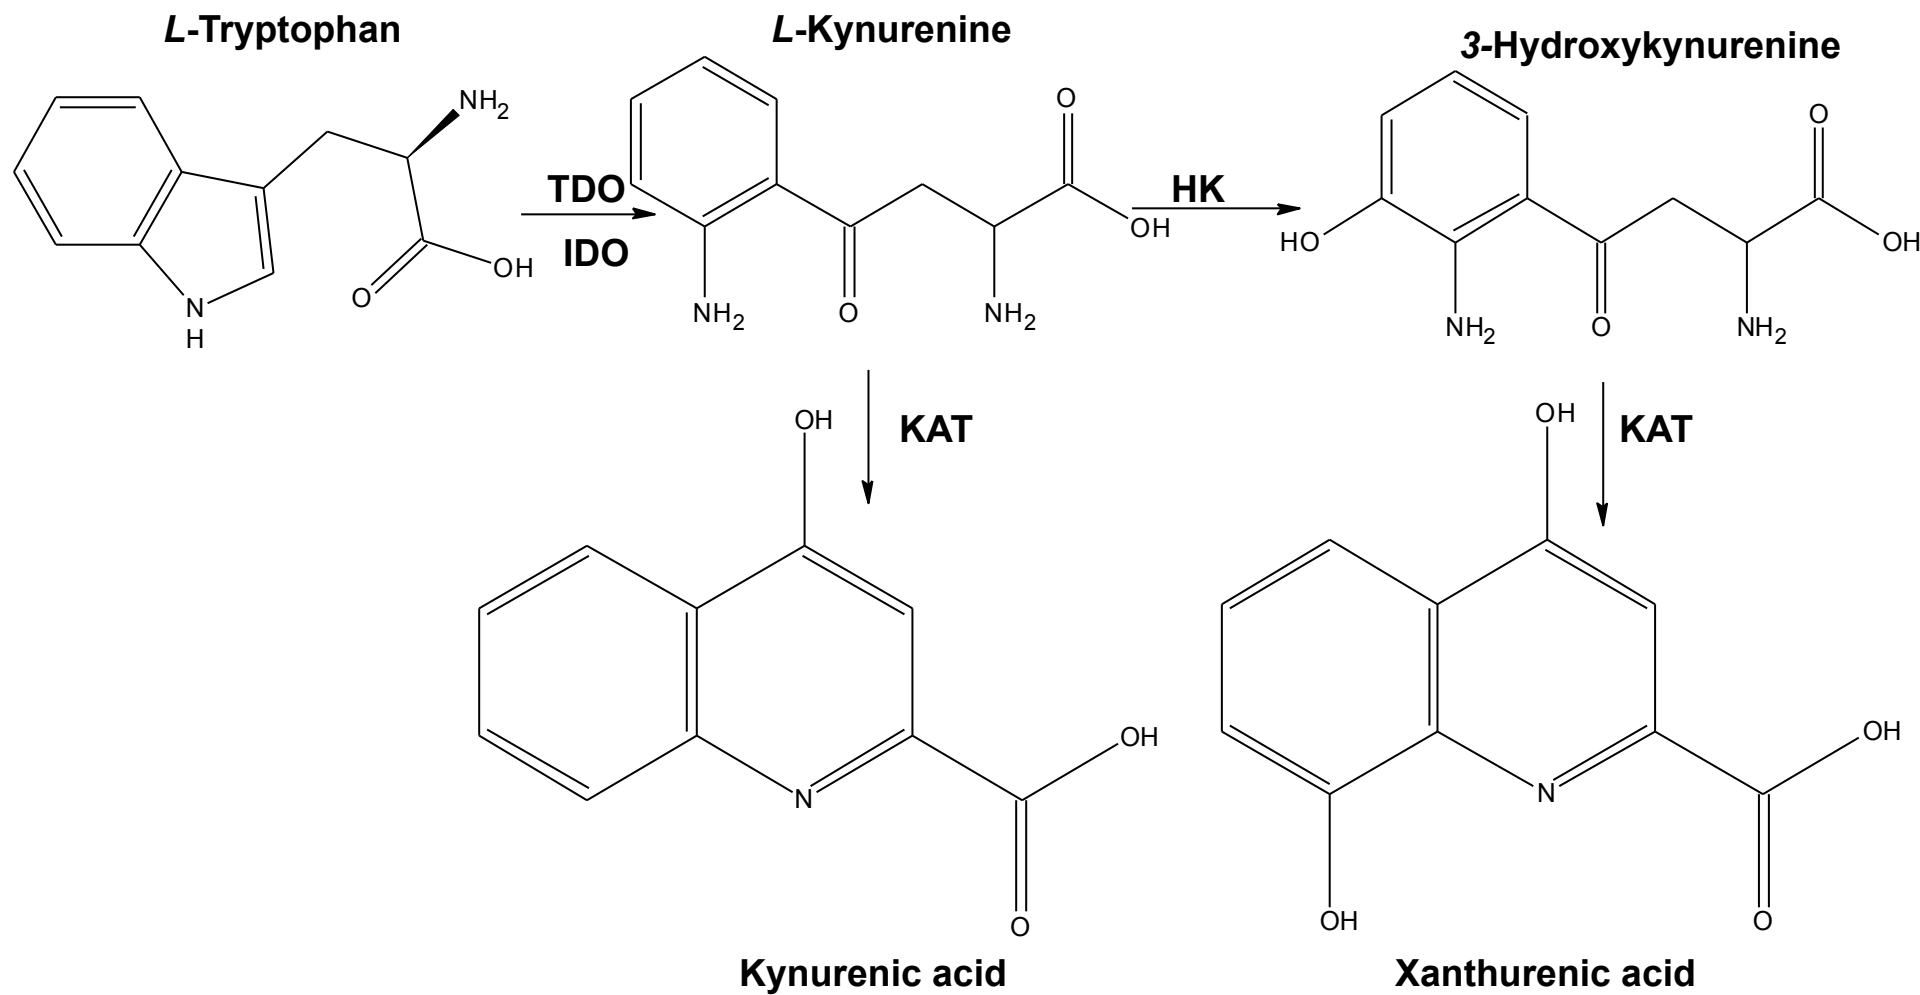

*Notes.* TDO, tryptophan 2,3-dioxygenase; IDO, indoleamine 2,3-dioxygenase; HK, kynurenine 3-hydroxylase; KAT, kynurenine aminotransferase.

**SUPPLEMENTARY TABLE S1**  
**Non-human Primate Hematology Values**

| <b>MALE</b>                 | 2 Gy      |           | 4 Gy            |                 | 6 Gy            |               | 7 Gy       |           | 10 Gy      |           |
|-----------------------------|-----------|-----------|-----------------|-----------------|-----------------|---------------|------------|-----------|------------|-----------|
|                             | Pre-      | Post-     | Pre-            | Post-           | Pre-            | Post-         | Pre-       | Post-     | Pre-       | Post-     |
|                             | Mean±S.D. | Mean±S.D. | Mean±S.D.       | Mean±S.D.       | Mean±S.D.       | Mean±S.D.     | Mean±S.D.  | Mean±S.D. | Mean±S.D.  | Mean±S.D. |
| WBC (x10 <sup>9</sup> /L)   | 8.29±1.51 | 1.99±0.97 | 10.82±3.27      | 1.2±0.37        | 11.53±2.44      | 0.84±0.2      | 10.87±5.58 | 0.53±0.2  | 10.52±3.32 | 0.2±0.06  |
| RBC (x10 <sup>12</sup> /L)  | 5.75±0.54 | 4.83±0.56 | 5.63±0.38       | 4.43±0.42       | 5.99±0.37       | 4.99±0.37     | 5.98±0.52  | 4.82±0.33 | 5.86±48    | 5.12±0.41 |
| HGB (g/L)                   | 140±10.6  | 117±10.5  | 139±7.9         | 108±9.1         | 143±8.3         | 117±8.6       | 143±11.2   | 114±8.7   | 142±9.8    | 122±9.6   |
| HCT (L/L)                   | 0.44±0.04 | 0.36±0.03 | 0.43±0.03       | 0.33±0.03       | 0.45±0.03       | 0.36±0.03     | 0.45±0.04  | 0.35±0.02 | 0.45±0.03  | 0.38±0.04 |
| PLT (x10 <sup>9</sup> /L)   | 389±56.7  | 581±113.4 | <b>392±64.5</b> | <b>416±56.7</b> | <b>365±72.7</b> | <b>289±85</b> | 427±78.1   | 311±64.7  | 404±46.8   | 257±86.3  |
| NEUT (x10 <sup>9</sup> /L)  | 2.97±1.09 | 0.93±0.55 | 5.05±3.5        | 0.65±0.36       | 4.71±1.23       | 0.46±0.21     | 6.23±4.21  | 0.28±0.16 | 5.09±3.01  | 0.06±0.02 |
| LYMPH (x10 <sup>9</sup> /L) | 4.87±1.37 | 0.87±0.51 | 5.18±1.28       | 0.49±0.27       | 6.22±2.07       | 0.33±0.13     | 4.11±1.55  | 0.21±0.09 | 4.89±1.52  | 0.12±0.04 |
| MONO (x10 <sup>9</sup> /L)  | 0.23±0.07 | 0.12±0.07 | 0.34±0.14       | 0.05±0.02       | 0.3±0.12        | 0.03±0.02     | 0.34±0.26  | 0.02±0.02 | 0.32±0.08  | 0.01±0    |
| EOS (x10 <sup>9</sup> /L)   | 0.1±0.06  | 0.03±0.02 | 0.11±0.11       | 0±0             | 0.12±0.21       | 0.01±0.01     | 0.06±0.05  | 0.01±0.01 | 0.1±0.06   | 0±0       |
| BASO (x10 <sup>9</sup> /L)  | 0.03±0.01 | 0±0       | 0.04±0.01       | 0±0             | 0.05±0.03       | 0±0           | 0.03±0.03  | 0±0       | 0.03±0.02  | 0±0       |

  

| <b>FEMALE</b>               | 2 Gy      |           | 4 Gy            |                 | 6 Gy            |               | 7 Gy      |           | 10 Gy     |           |
|-----------------------------|-----------|-----------|-----------------|-----------------|-----------------|---------------|-----------|-----------|-----------|-----------|
|                             | Pre-      | Post-     | Pre-            | Post-           | Pre-            | Post-         | Pre-      | Post-     | Pre-      | Post-     |
|                             | Mean±S.D. | Mean±S.D. | Mean±S.D.       | Mean±S.D.       | Mean±S.D.       | Mean±S.D.     | Mean±S.D. | Mean±S.D. | Mean±S.D. | Mean±S.D. |
| WBC (x10 <sup>9</sup> /L)   | 7.36±1.96 | 2.23±0.99 | 7.63±2.47       | 0.83±0.19       | 8.75±1.9        | 0.5±0.22      | 9.26±2.39 | 0.45±0.22 | 8.37±2.73 | 0.19±0.14 |
| RBC (x10 <sup>12</sup> /L)  | 5.52±0.25 | 4.45±0.36 | 5.47±0.23       | 4.21±0.37       | 5.51±0.49       | 4.49±0.52     | 5.55±0.5  | 4.68±0.41 | 5.23±0.41 | 4.82±0.75 |
| HGB (g/L)                   | 132±5.4   | 105±8     | 133±6           | 100±7.7         | 132±8.7         | 104±8.8       | 132±7.7   | 109±8     | 131±8.8   | 118±16.8  |
| HCT (L/L)                   | 0.42±0.01 | 0.33±0.02 | 0.42±0.02       | 0.32±0.03       | 0.42±0.04       | 0.33±0.04     | 0.42±0.03 | 0.34±0.02 | 0.41±0.03 | 0.36±0.05 |
| PLT (x10 <sup>9</sup> /L)   | 393±56    | 568±44    | <b>411±42.1</b> | <b>442±78.3</b> | <b>329±68.8</b> | <b>289±74</b> | 383±71.2  | 311±88.5  | 416±83.7  | 290±61    |
| NEUT (x10 <sup>9</sup> /L)  | 3.39±1.52 | 1.43±0.7  | 4.15±2.38       | 0.45±0.15       | 4.65±1.99       | 0.23±0.1      | 5.6±1.72  | 0.21±0.1  | 4.22±2.86 | 0.06±0.04 |
| LYMPH (x10 <sup>9</sup> /L) | 3.45±0.85 | 0.63±0.36 | 3.12±1.34       | 0.32±0.13       | 3.64±1.11       | 0.23±0.13     | 3.16±0.81 | 0.21±0.09 | 3.71±1.06 | 0.11±0.09 |
| MONO (x10 <sup>9</sup> /L)  | 0.35±0.18 | 0.13±0.05 | 0.23±0.09       | 0.04±0.01       | 0.28±0.13       | 0.03±0.02     | 0.3±0.13  | 0.03±0.03 | 0.23±0.07 | 0.01±0.02 |
| EOS (x10 <sup>9</sup> /L)   | 0.09±0.07 | 0.02±0.02 | 0.07±0.07       | 0.04±0.01       | 0.09±0.05       | 0±0           | 0.09±0.05 | 0.01±0.01 | 0.12±0.13 | 0±0       |
| BASO (x10 <sup>9</sup> /L)  | 0.02±0.01 | 0±0       | 0.02±0.01       | 0±0             | 0.02±0.01       | 0±0           | 0.02±0.01 | 0±0       | 0.03±0.01 | 0±0       |

*Notes.* WBC, white blood cell count; RBC, red blood cell count; HGB, hemoglobin count; HCT, hematocrit level; PLT, platelet count; NEUT, neutrophil count; LYMPH, lymphocyte count; MONO, monocyte count; EOS, eosinophil count; BASO, basophil count. **Bold denotes  $P > 0.05$**

**SUPPLEMENTARY TABLE S2**  
**Putative Non-human Primate Urinary Biomarkers**

| Putative biomarkers | Experimental <i>m/z</i> | RT min | Adduct            | Mass error ppm | <i>P</i> -value | Fold change |
|---------------------|-------------------------|--------|-------------------|----------------|-----------------|-------------|
| Dihydrouracil       | 132.0765                | 0.59   | M+NH <sub>4</sub> | 2.03           | <0.001          | 10.7        |
| Guanosine           | 284.0995                | 1.60   | M+H               | 1.93           | 0.001           | 7.9         |
| Cortexolone         | 347.2232                | 5.43   | M+H               | 3.47           | <0.001          | 33.7        |
| Sebacic acid*       | 201.1140                | 4.13   | M-H               | 3.79           | 0.008           | 1.9         |
| Corticosterone      | 347.2229                | 5.58   | M+H               | 3.47           | <0.001          | 294.7       |
| Deoxyguanosine      | 268.1049                | 1.47   | M+H               | 3.29           | 0.001           | 1.7         |
| Deoxycorticosterone | 331.2282                | 5.37   | M+H               | 4.35           | <0.001          | 8.3         |

*Notes.* *P*-value (from Welch's *t* test) and fold change from control compared to 10.0 Gy (\*from 6.0 Gy)

**SUPPLEMENTARY TABLE S3**  
**Putative Acylcarnitine and Acylglycine Species of  $\gamma$  Radiation in Non-human Primates**

| Putative biomarkers                    | Experimental<br>ion $m/z$ | RT<br>min         | Mass error<br>ppm | <i>P</i> -value | Fold change |
|----------------------------------------|---------------------------|-------------------|-------------------|-----------------|-------------|
| Isovalerylcarnitine                    | 246.1697                  | 3.33              | 1.16              | <0.001          | 38.3        |
| 6-Keto-decanoylcarnitine               | 330.2284                  | 4.48 <sup>†</sup> | 2.75              | <0.001          | 7.2         |
| Tiglylcarnitine                        | 244.1541                  | 3.11              | 1.00              | 0.001           | 7.7         |
| Heptanoylcarnitine                     | 274.2017                  | 5.08              | 1.54              | 0.005           | 7.4         |
| 9-Dodecanoylcarnitine                  | 314.2331                  | 5.84              | 1.63              | 0.008           | 6.9         |
| Propionoylcarnitine                    | 218.1379                  | 4.99              | 3.63              | 0.014           | 2.1         |
| 2-trans,4-cis-<br>Decadienoylcarnitine | 312.2173                  | 5.61              | 1.17              | 0.657           | 3.4         |
| Nonanoylcarnitine                      | 302.2334                  | 5.71              | 2.69              | 0.789           | 3.8         |
| L-prolyl-L-glycine                     | 173.0915                  | 1.75              | 3.33              | <0.001          | 1.2         |
| Indolylacryloylglycine                 | 245.0921                  | 4.96              | 0.11              | <0.001          | 0.6         |
| Phenylpropionylglycine                 | 208.0971                  | 4.78              | 1.36              | 0.001           | 1.1         |
| Phenylacetyl-glycine                   | 194.0809                  | 3.80              | 1.44              | 0.171           | 6.0         |
| Isobutyrylglycine                      | 146.0802                  | 1.95              | 6.74              | 0.492           | 2.7         |
| Tiglylglycine                          | 158.0806                  | 2.21              | 3.68              | 0.001           | 0.9         |
| Suberyl-glycine                        | 232.1172                  | 3.32              | 3.25              | 0.060           | 2.2         |
| 2-Furoyl-glycine                       | 170.0440                  | 2.18              | 4.16              | 0.064           | 4.0         |
| 2-Methylbutyrylglycine                 | 160.0958                  | 3.15              | 6.41              | <0.001          | 0.7         |

*Notes.* All  $[M+H]^+$  ions; *P*-value (from Welch's *t*-test) and fold change from control compared to 10.0 Gy; <sup>†</sup> also detected at RT 5.18 and 5.37
